1 **Acute temporal effect of ambient air pollution on common**  
2 **congenital cardiovascular defects and cleft palate: a case-crossover**  
3 **study**

4 Temuulen Enebish<sup>1</sup>, Meredith Franklin<sup>2</sup>, Rima Habre<sup>3</sup>, Carrie Breton<sup>3</sup>, Nomindelger Tuvshindorj<sup>4</sup>,  
5 Gantuya Tumor<sup>4</sup>, Bayalag Munkhuu<sup>4</sup>, David Warburton<sup>5,6</sup>

6

7 <sup>1</sup>World Health Organization Country Office, Ulaanbaatar, Mongolia

8 <sup>2</sup>Department of Statistical Sciences, University of Toronto, Toronto, Ontario, Canada

9 <sup>3</sup>Department of Population and Public Health Sciences, Keck School of Medicine, University of  
10 Southern California, Los Angeles, California, USA

11 <sup>4</sup>Department of Surveillance and Research, National Center for Maternal and Child Health,  
12 Ulaanbaatar, Mongolia

13 <sup>5</sup>Saban Research Institute, Children's Hospital Los Angeles, Los Angeles, California, USA

14 <sup>6</sup>Department of Pediatrics, Keck School of Medicine, University of Southern California, Los  
15 Angeles, California, USA

16

17

18 **Corresponding author:**

19 Name: Temuulen Enebish

20 Email: [temuulen@gmail.com](mailto:temuulen@gmail.com)

21 Postal address: PO Box 219, PO Office 49, Ulaanbaatar, Mongolia 13381

22

23 **Conflicts of Interest:**

24 The authors declare they have nothing to disclose.

25 **Acute temporal effect of ambient air pollution on common**  
26 **congenital cardiovascular defects and cleft palate: a case-crossover**  
27 **study**

28 **Abstract**

29 This symmetric bidirectional case-crossover study examined the association between short-  
30 term ambient air pollution exposure during weeks 3-8 of pregnancy and certain common congenital  
31 anomalies in Ulaanbaatar, Mongolia, between 2014 and 2018. Using predictions from a Random  
32 Forest regression model, authors assigned daily ambient air pollution exposure of particulate matter  
33 <2.5 um aerodynamic diameter, sulphur dioxide, nitrogen dioxide, and carbon monoxide for each  
34 subject based on their administrative area of residence. We used conditional logistic regression with  
35 adjustment for corresponding apparent temperature to estimate relative odds of select congenital  
36 anomalies per IQR increase in mean concentrations and quartiles of air pollutants. The adjusted  
37 relative odds of cardiovascular defects (ICD-10 subchapter: Q20-Q28) was 2.64 (95% confidence  
38 interval: 1.02-6.87) per interquartile range increase in mean concentrations of particulate matter <2.5  
39 um aerodynamic diameter for gestational week 7. This association was further strengthened for  
40 cardiac septal defects (ICD-10 code: Q21, odds ratio: 7.28, 95% confidence interval: 1.6-33.09) and  
41 isolated ventricular septal defects (ICD-10 code: Q21.0, odds ratio: 9.87, 95% confidence interval:  
42 1.6-60.93). We also observed an increasing dose-response trend when comparing the lowest quartile  
43 of air pollution exposure with higher quartiles on weeks 6 and 7 for Q20-Q28 and Q21 and week 4  
44 for Q21.0. Other notable associations include increased relative odds of cleft lip and cleft palate  
45 subchapter (Q35-Q37) and PM<sub>2.5</sub> (OR: 2.25, 95% CI: 0.62-8.1), SO<sub>2</sub> (OR: 2.6, 95% CI: 0.61-11.12),  
46 and CO (OR: 2.83, 95% CI: 0.92-8.72) in week 4. Our findings contribute to the limited body of  
47 evidence regarding the acute effect of ambient air pollution exposure on common adverse birth  
48 outcomes.

## 49 **Background**

50 Congenital anomalies pose a significant risk of global infant mortality, life-long illness,  
51 disability and have a heavy burden on resource-scarce countries. Worldwide estimates show that  
52 about 13% of total mortality among children under five years of age was due to congenital anomalies  
53 (CA) in 2016 (World Health Organization, 2017). The most common forms of major CA include  
54 congenital heart defects, cleft lip and palate and neural tube defects. Although CA are a global  
55 problem, 94 percent of births with severe congenital malformations and 95 percent of the mortality  
56 among these children occur in middle and low-income countries. Maternal health and other risk  
57 factors such as poverty, a higher proportion of older mothers, and a larger frequency of  
58 consanguineous marriages partly explain this significant difference. In terms of aetiology, about half  
59 of all major CA are unknown and hypothesized to have multiple causal factors, including  
60 environmental exposures (Christianson et al., 2005).

61 Our previous work looking at the short-term effect of air pollution on the occurrence of  
62 stillbirth (Enebish et al., 2022) found a significantly increased risk of exposure to high air pollution  
63 on days 3 and 6 prior to delivery of a stillbirth. In comparison to stillbirth, there have been a  
64 significant number of studies investigating the association between air pollution and CA. Ritz et  
65 al. used data from the California Congenital anomalies Monitoring Program to look at associations  
66 between CA and average monthly ambient air pollution. To our knowledge, it was the first attempt  
67 to explore these associations using case-control design with individual-level data for confounding  
68 controls. They found an increased risk of cardiac ventricular septal defects with a dose-response  
69 trend as well as increased risks for several other CA (B. R. Ritz et al., 2002). Since then, research  
70 groups in the US and around the world have conducted a significant number of case-control studies  
71 investigating the association, including Texas (Gilboa et al., 2005), New Jersey (Marshall et al., 2010),  
72 California (Padula et al., 2013), Taiwan (Lin et al., 2014), the UK (Dadvand et al., 2011; Dolk et al.,

73 2010; Rankin et al., 2009), Australia (Hansen et al., 2009), Israel (Agay-Shay et al., 2013), Spain  
74 (Schembari et al., 2014), and Italy (Gianicolo et al., 2014). The results of these studies varied  
75 considerably, probably due to design heterogeneities derived from different case ascertainment  
76 procedures and exposure assessment methodologies. A few reviews have attempted to synthesize  
77 the findings and found suggestive evidence of increased congenital cardiac anomaly risk associated  
78 with NO<sub>2</sub>, SO<sub>2</sub>, and PM<sub>2.5</sub> (Vrijheid et al., 2011) as well as a significant association between NO<sub>2</sub> and  
79 coarctation of the aorta (Chen et al., 2014). While these studies utilized state or country-wide  
80 congenital anomaly surveillance systems for outcome ascertainment, the exposure assessment was  
81 usually limited to either spatial gradient based on distance from monitoring stations or temporal  
82 gradient based on gestation periods. This kind of exposure assessment may lead to substantial  
83 exposure misclassification, exacerbating the residual confounding problem of using registry data  
84 with limited covariate information.

85         Although the biological mechanism of how air pollutants may cause congenital anomalies is  
86 unknown, several plausible pathological pathways have been proposed based on laboratory studies.  
87 Several studies showed that polycyclic aromatic hydrocarbons (PAH) products attach to DNA,  
88 activating DNA repair processes and producing DNA adducts, changing gene function and altering  
89 foetal development (Perera et al., 1999). Oxidative stress and inflammatory cytokines triggered by air  
90 pollution can adversely affect the foetus via a change in placental functions such as trophoblast  
91 proliferation and differentiation as well as apoptosis (Jonakait, 2007; Kannan et al., 2006; Slama et  
92 al., 2008). The other possible mechanisms relate to phenotypical changes caused by air pollution due  
93 to epigenetic processes such as DNA methylation and acetylation, histone modifications, and  
94 microRNA expressions (Baccarelli & Bollati, 2009; Hou et al., 2012). Some studies demonstrated  
95 that decreased placental or global methylation is associated with increased PM<sub>2.5</sub> and PAH  
96 (Herbstman et al., 2012; Janssen et al., 2013).

97 Ulaanbaatar (UB), the capital city of Mongolia, has hazardous levels of air pollution during  
98 winter due to more than half of its residents burning coal for domestic heating, combined with an  
99 atmospheric inversion that traps emissions within the breathing zone. Infant mortality rates in  
100 Mongolia have substantially declined in the last 20 years: 63.4 per 1000 live births in 1990 to 13.4 per  
101 1000 live births in 2018. However, the proportion of deaths due to congenital anomalies has  
102 increased from 12.7 percent in 2014 to 16 percent in 2018 (*Comprehensive Survey of the Status of Maternal  
103 and Child Morbidity and Mortality, and Prevalence of Congenital Anomalies in Mongolia - V*, 2019). We have  
104 seen some alarming results indicating high attributable mortality (Allen et al., 2013) due to air  
105 pollution and a strong correlation with miscarriage (Enkhmaa et al., 2014) in the city. Previously, we  
106 have mitigated the exposure measurement limitations (inadequate and unreliable monitoring  
107 network) of a resource-poor country like Mongolia by utilizing machine learning algorithms for  
108 exposure assessment (Enebish et al., 2020). Also, the authors used an electronic surveillance  
109 database to ascertain outcomes to overcome the constraints of an overworked and underfinanced  
110 healthcare system (Enebish et al., 2022).

111 The objective of the current study was to investigate the short-term effects of ambient air  
112 pollution on the risk of delivering a new-born with select common congenital anomalies in  
113 Ulaanbaatar, Mongolia. Specifically, we examined 1) different gestational weeks of exposure periods  
114 and 2) risks of select congenital anomalies according to ICD-10 for both continuous and categorical  
115 (dose-response) exposure.

## 116 **Methods**

117 Ulaanbaatar city registered about 200,000 live births between 2014 and 2018. During this  
118 period, there were 1487 cases of CA which resulted in a rate of 7.3 per 1000 live births. This rate is  
119 slightly lower than the national average of 8.1 per 1000 live births. The current study includes CA

120 occurring between January 1, 2014, and December 31, 2018, in UB. The Institutional Review Boards  
121 at the Health Sciences Campus of USC and the Children's Hospital Los Angeles and the Medical  
122 Ethics Committee of the Ministry of Health of Mongolia approved the study design and methods.

### 123 **Study population**

124 We obtained individual-level CA data from the Surveillance Department of the National  
125 Center for Maternal and Child Health of Mongolia (NCMCH). In 2014, the Ministry of Health  
126 established the department to set up a nationwide active surveillance system for maternal and child  
127 health indicators such as maternal mortality, stillbirth, and congenital anomaly. The study team  
128 acquired data between 2014 and 2018 from the CA data collection form enumerated in the  
129 electronic database. The translated version of the data collection form for CA can be found in  
130 Supplemental Materials. The following information was abstracted from the form: maternal age,  
131 residential address, education, occupation, parity, smoking status, folic acid usage, date of birth,  
132 foetal gender, weight, and gestational age. Gestational age was defined by the best obstetric estimate  
133 variable in the birth record, which combines the last menstrual period and ultrasound parameters, as  
134 is commonly accepted in clinical practice for gestational age estimation. The WHO defines  
135 congenital anomalies as structural or functional anomalies that occur during the intrauterine period  
136 and can be identified prenatally, at birth, or sometimes may only be detected later in infancy (Joint  
137 WHO-March of Dimes Meeting on Management of Birth Defects and Haemoglobin Disorders  
138 (2nd : 2006 : Geneva et al., 2006). For the current study, eligible cases were singleton births, having a  
139 maternal residential address in one of the six central districts, and were non-chromosomal CA  
140 (Figure 1) having one of 7 CA categories. However, due to a low number of cases, we were only able  
141 to analyse five subchapters of ICD-10 chapter Q00-Q99 (Congenital malformations, deformations,  
142 and chromosomal abnormalities), one major diagnosis, and one isolated defect (Table 1) in this  
143 study (World Health Organization, 2004). We also added Khoroo (small administrative unit of the

144 city) level variables such as percentage of households with internet connectivity (a proxy for  
145 socioeconomic status), percentage of Ger (traditional portable dwelling) households, and a number  
146 of stoves per square kilometre based on the residential Khoroo of each subject.

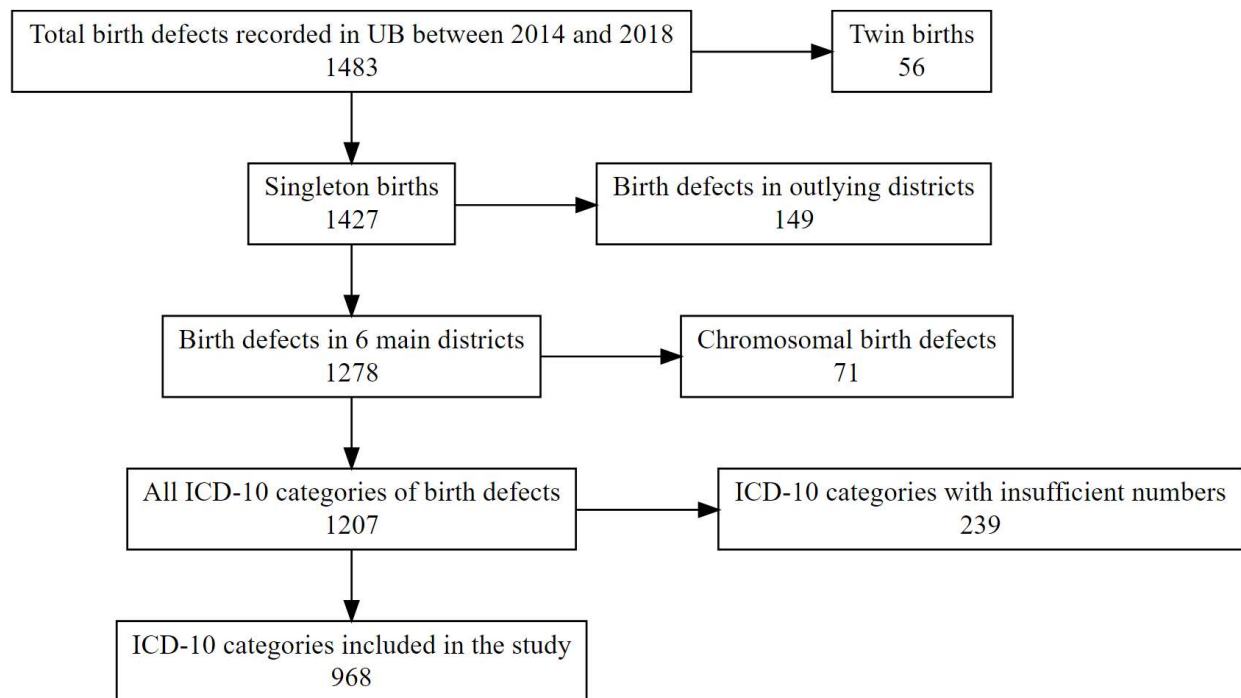

147  
148 Figure 1. Flow chart of the study population

### 149 **Exposure data**

150 We used daily air pollution estimates derived from a previously developed and validated  
151 spatiotemporal model, linking them to the residential Khoroo and averaging over the week for the  
152 relevant dates of each CA case. We also calculated apparent temperature using atmospheric  
153 temperature and wind speed or relative humidity based on the atmospheric temperature of  
154 corresponding weeks to control it. The authors covered the details of our prediction models  
155 (Enebish et al., 2020) and how we applied them to an adverse reproductive outcome (Enebish et al.,  
156 2022) in our previously published works. In addition to continuous exposure measures, we  
157 calculated quartiles of each pollutant assigned to our control and case periods to look at the dose-  
158 response gradient.

159

160 Table 1. Outcome Groups and ICD-10 Codes Included in the Analysis

| Outcome group                                                           | ICD-10 code(s) | n   |
|-------------------------------------------------------------------------|----------------|-----|
| Congenital Malformations of The Circulatory System                      | Q20-Q28        | 282 |
| Congenital Malformations and Deformations of The Musculoskeletal System | Q65-Q79        | 221 |
| Congenital Malformations of Multiple Organ Systems                      |                | 175 |
| Cleft Lip and Cleft Palate                                              | Q35-Q37        | 159 |
| Congenital Malformations of Eye, Ear, Face and Neck                     | Q10-Q18        | 131 |
| Congenital malformations of cardiac septa                               | Q21            | 122 |
| Ventricular septal defect                                               | Q21.0          | 94  |

161 **Study design**

162 The symmetric bidirectional case-crossover design was used to estimate the relative odds of  
163 specific CA associated with each interquartile range (IQR) increase in mean pollutant concentrations  
164 and 2nd-4th quartile compared to the lowest quartile. We used a case-crossover design with a  
165 different referent period selection method in our previous work on the association between stillbirth  
166 and ambient air pollution (Enebish et al., 2022). The current study utilizes symmetric bidirectional  
167 referent selection instead of time-stratified referent selection. Unlike time-stratified referent  
168 selection, bidirectional selection creates non-localizable referent windows, which means that the  
169 conditional logistic regression estimating equations are somewhat affected by overlap bias. However,  
170 Janes et al. noted that the bias is usually small, particularly for symmetric bidirectional designs (Janes  
171 et al., 2005). This control selection method still allows us to control long-term and seasonal time  
172 trends by design. We could not use more robust time-stratified referent selection because there is no  
173 identifiable single event date for congenital anomalies due to their nature. Instead, we considered  
174 susceptible gestational weeks as our case periods and the weekly averages with a one-week wash-out  
175 period in both directions as control periods. We looked at gestational weeks 3-8 as susceptible  
176 periods since most active foetal organ development happens during this time, thus making them  
177 vulnerable to environmental teratogens. For instance, we designated week one and week five as



178 controls when we considered week three as our case period in our analyses. Gestational weeks were  
179 determined based on conception dates which we calculated by subtracting gestational weeks at birth  
180 from the birth dates of each subject.

## 181 **Statistical analysis**

182 We used conditional logistic regression to estimate the effect of ambient air pollution (PM<sub>2.5</sub>,  
183 SO<sub>2</sub>, NO<sub>2</sub>, and CO) on the occurrence of the selected CA during vulnerable periods of gestation.  
184 Like our previous study on stillbirth, we estimated log odds of each CA per IRQ increase in  
185 continuous measures and quartiles with the lowest as a reference in categorical measures. All models  
186 were adjusted for the weekly mean apparent temperature of corresponding gestational weeks to  
187 control time-dependent confounding. Confounders such as age, socioeconomic status, and  
188 comorbidity were considered unchanged in the short term and therefore controlled by study design.  
189 Ambient air pollution exposure quartiles were examined to determine whether there are identifiable  
190 dose-response curves for any of the CA and determine their shape. We evaluated influential  
191 gestational weeks of exposure based on the magnitude and pattern of the observed risk estimates  
192 and their confidence interval widths. All statistical modelling and geospatial computing were  
193 performed in R version 3.6.2 (R Core Team, 2019) using packages “tidyverse” (Wickham et al.,  
194 2019), “sf” (Pebesma, 2018), and “survival” (Therneau & Grambsch, 2000).

## 195 **Results**

196 After applying the inclusion and exclusion criteria, our study population consisted of 968  
197 congenital anomaly cases between 2014 and 2018 (Figure 1). We show the demographic and  
198 residential factors of the study subjects by CA groups in Table 2. About one in five mothers were 35  
199 years or older, and most of them had graduated college or trade school (61%) and were employed  
200 (63%). Only about 6% of the mothers reported smoking, while 43% had used folic acid supplements  
201 within the first 12 weeks of gestation. Most mothers had previously given birth (65%), and the foetal



|                     | ICD-10 subchapters      |                         |                                        |                         |                         | Cardiac septa       | Ventricular septal defect | Overall            |
|---------------------|-------------------------|-------------------------|----------------------------------------|-------------------------|-------------------------|---------------------|---------------------------|--------------------|
|                     | Q20-Q28<br><i>N=282</i> | Q65-Q79<br><i>N=221</i> | Multiple organ systems<br><i>N=175</i> | Q35-Q37<br><i>N=159</i> | Q10-Q18<br><i>N=131</i> | Q21<br><i>N=122</i> | Q21.0<br><i>N=94</i>      | [ALL] <i>N=968</i> |
| 15 stoves or less   | 39%                     | 34%                     | 32%                                    | 28%                     | 34%                     | 39%                 | 39%                       | 34%                |
| more than 15 stoves | 61%                     | 66%                     | 68%                                    | 72%                     | 66%                     | 61%                 | 61%                       | 66%                |

208 Odds ratio (OR) estimates and their 95% confidence intervals (95% CI) for each IQR  
209 increase in mean pollutant concentrations for every CA group examined by different gestational  
210 weeks are shown in Tables 3 and 4. We observed significantly increased relative odds (OR: 2.64,  
211 95% CI: 1.02-6.87) of cardiovascular defects (Q20-Q28) per IQR increase in mean PM<sub>2.5</sub>  
212 concentration in week 7 (Table 3). This association with PM<sub>2.5</sub> was strengthened in the subgroup of  
213 cardiac septal defects (OR: 7.28, 95% CI: 1.6-33.09) and isolated ventricular septal defects (OR: 9.87,  
214 95% CI: 1.6-60.93). We also obtained similar significantly increased relative odds of cardiac septal  
215 defects (OR: 3.12, 95% CI: 0.99-9.82) and isolated ventricular septal defects (OR: 3.96, 95% CI:  
216 1.05-14.93) per IQR increase in mean concentrations of CO in week 7. The relative odds of the  
217 association between PM<sub>2.5</sub> and ventricular septal defects were increased on week 4 (OR: 6.01, 95%  
218 CI: 1.04-34.7) as well (Table 3). Other notable associations include increased relative odds of cleft lip  
219 and cleft palate subchapter (Q35-Q37) and PM<sub>2.5</sub> (OR: 2.25, 95% CI: 0.62-8.1), SO<sub>2</sub> (OR: 2.6, 95%  
220 CI: 0.61-11.12), and CO (OR: 2.83, 95% CI: 0.92-8.72) in week 4 (Table 4). We did not see  
221 consistent effects on any of the other ICD-10 CA subchapters.

222

223

224

225

226

227

228

229 Table 3. Relative Odds of Congenital Anomalies Related to Cardiovascular System

| Pollutants        | Gestationa<br>l weeks | IQR,<br>µg/m <sup>3</sup> | Circulatory<br>system<br>(n = 281)<br>OR (95% CI) | Cardiac Septa<br>(n = 122)<br>OR (95% CI) | VSD<br>(n = 94)<br>OR (95% CI) |
|-------------------|-----------------------|---------------------------|---------------------------------------------------|-------------------------------------------|--------------------------------|
| PM <sub>2.5</sub> | 3                     | 88.51                     | 1.01 (0.41-2.47)                                  | 1.37 (0.38-4.96)                          | 1.54 (0.29-8.13)               |
|                   | 4                     | 89.31                     | 1.2 (0.46-3.16)                                   | 2.57 (0.61-10.82)                         | <b>6.01 (1.04-34.7)</b>        |
|                   | 5                     | 89.18                     | 0.49 (0.18-1.28)                                  | 0.21 (0.05-0.92)                          | 0.14 (0.02-0.84)               |
|                   | 6                     | 89.65                     | 1.49 (0.58-3.77)                                  | 0.84 (0.22-3.2)                           | 0.47 (0.1-2.26)                |
|                   | 7                     | 89.04                     | <b>2.64 (1.02-6.87)</b>                           | <b>7.28 (1.6-33.09)</b>                   | <b>9.87 (1.6-60.93)</b>        |
|                   | 8                     | 87.48                     | 0.53 (0.21-1.39)                                  | 0.92 (0.23-3.68)                          | 1.71 (0.34-8.56)               |
| SO <sub>2</sub>   | 3                     | 32.69                     | 1.19 (0.45-3.1)                                   | 1.24 (0.33-4.65)                          | 1.48 (0.26-8.24)               |
|                   | 4                     | 32.72                     | 1.41 (0.51-3.93)                                  | 2.05 (0.43-9.7)                           | 5.56 (0.81-38.29)              |
|                   | 5                     | 33.45                     | 0.56 (0.21-1.47)                                  | 0.4 (0.08-1.89)                           | 0.29 (0.04-1.91)               |
|                   | 6                     | 33.03                     | 0.93 (0.38-2.23)                                  | 0.96 (0.28-3.25)                          | 0.6 (0.12-2.85)                |
|                   | 7                     | 33.45                     | 1.58 (0.64-3.91)                                  | 2.17 (0.57-8.18)                          | 2.94 (0.57-15.06)              |
|                   | 8                     | 33.11                     | 1.01 (0.43-2.38)                                  | 0.86 (0.26-2.77)                          | 1.18 (0.3-4.58)                |
| NO <sub>2</sub>   | 3                     | 26.55                     | 1.25 (0.58-2.69)                                  | 1 (0.37-2.73)                             | 1.01 (0.28-3.71)               |
|                   | 4                     | 26.14                     | 1.15 (0.54-2.44)                                  | 1.35 (0.44-4.21)                          | 2.09 (0.53-8.27)               |
|                   | 5                     | 26.07                     | 0.83 (0.42-1.65)                                  | 0.71 (0.24-2.1)                           | 0.6 (0.17-2.08)                |
|                   | 6                     | 26.14                     | 1.15 (0.61-2.16)                                  | 0.89 (0.31-2.55)                          | 0.7 (0.21-2.39)                |
|                   | 7                     | 26.17                     | 1.17 (0.6-2.28)                                   | 2.14 (0.68-6.68)                          | 2.06 (0.63-6.76)               |
|                   | 8                     | 26.30                     | 0.74 (0.39-1.39)                                  | 1.12 (0.42-2.97)                          | 1.28 (0.46-3.6)                |
| CO                | 3                     | 788.01                    | 1.32 (0.6-2.91)                                   | 1.1 (0.32-3.78)                           | 1.18 (0.3-4.67)                |
|                   | 4                     | 778.43                    | 1.15 (0.52-2.55)                                  | 2.17 (0.64-7.39)                          | 3.4 (0.73-15.83)               |
|                   | 5                     | 796.44                    | 0.6 (0.29-1.24)                                   | 0.52 (0.17-1.58)                          | 0.46 (0.14-1.54)               |
|                   | 6                     | 783.77                    | 1.17 (0.55-2.51)                                  | 0.9 (0.28-2.92)                           | 0.67 (0.17-2.7)                |
|                   | 7                     | 802.66                    | 1.81 (0.84-3.89)                                  | 3.12 (0.99-9.82)                          | <b>3.96 (1.05-14.93)</b>       |
|                   | 8                     | 796.83                    | 0.76 (0.35-1.68)                                  | 1.13 (0.37-3.49)                          | 1.64 (0.48-5.55)               |

Estimates significant at the 0.05 significance level are **bolded**

230

231

232

233

234

235 Table 4. Relative Odds of Select Congenital Anomalies

| Pollutants              | Gestational weeks | IQR, $\mu\text{g}/\text{m}^3$ | Musculoskeletal system (n = 220)<br>OR (95% CI) | Multiple organ systems (n = 173)<br>OR (95% CI) | Cleft lip and cleft palate (n = 159)<br>OR (95% CI) | Eye, ear, face and neck (n = 130)<br>OR (95% CI) |
|-------------------------|-------------------|-------------------------------|-------------------------------------------------|-------------------------------------------------|-----------------------------------------------------|--------------------------------------------------|
| <b>PM<sub>2.5</sub></b> | 3                 | 88.51                         | 1.48 (0.52-4.18)                                | 0.57 (0.19-1.69)                                | 0.75 (0.22-2.57)                                    | 1.03 (0.28-3.87)                                 |
|                         | 4                 | 89.31                         | 0.62 (0.23-1.68)                                | 0.49 (0.17-1.38)                                | 2.25 (0.62-8.1)                                     | 0.27 (0.06-1.25)                                 |
|                         | 5                 | 89.18                         | 1.06 (0.33-3.37)                                | 0.86 (0.3-2.46)                                 | 1.33 (0.42-4.27)                                    | 0.99 (0.26-3.81)                                 |
|                         | 6                 | 89.65                         | 1.24 (0.42-3.65)                                | 1.27 (0.4-4.06)                                 | 0.63 (0.22-1.82)                                    | 2 (0.48-8.3)                                     |
|                         | 7                 | 89.04                         | 0.92 (0.32-2.63)                                | 2.19 (0.71-6.77)                                | 0.78 (0.29-2.11)                                    | 0.9 (0.24-3.39)                                  |
|                         | 8                 | 87.48                         | 1.37 (0.42-4.46)                                | 1.78 (0.58-5.46)                                | 1.04 (0.39-2.8)                                     | 0.66 (0.19-2.27)                                 |
| <b>SO<sub>2</sub></b>   | 3                 | 32.69                         | 1.55 (0.66-3.67)                                | 1.17 (0.45-3.07)                                | 1.37 (0.32-5.9)                                     | 1.66 (0.38-7.3)                                  |
|                         | 4                 | 32.72                         | 0.71 (0.29-1.78)                                | 0.76 (0.29-1.99)                                | 2.6 (0.61-11.12)                                    | 0.65 (0.16-2.71)                                 |
|                         | 5                 | 33.45                         | 0.53 (0.2-1.41)                                 | 0.73 (0.28-1.95)                                | 0.83 (0.23-2.97)                                    | 1 (0.27-3.74)                                    |
|                         | 6                 | 33.03                         | 0.95 (0.34-2.67)                                | 0.81 (0.29-2.27)                                | 0.83 (0.24-2.84)                                    | 1.07 (0.25-4.51)                                 |
|                         | 7                 | 33.45                         | 1.25 (0.53-2.95)                                | 0.99 (0.36-2.68)                                | 0.86 (0.26-2.77)                                    | 0.92 (0.24-3.48)                                 |
|                         | 8                 | 33.11                         | 1.6 (0.57-4.52)                                 | 2.03 (0.62-6.57)                                | 0.6 (0.19-1.96)                                     | 1.34 (0.35-5.14)                                 |
| <b>NO<sub>2</sub></b>   | 3                 | 26.55                         | 1.3 (0.7-2.4)                                   | 0.82 (0.36-1.86)                                | 0.91 (0.4-2.09)                                     | 0.98 (0.36-2.66)                                 |
|                         | 4                 | 26.14                         | 0.91 (0.48-1.72)                                | 0.75 (0.35-1.58)                                | 1.15 (0.49-2.71)                                    | 0.74 (0.27-1.98)                                 |
|                         | 5                 | 26.07                         | 0.89 (0.45-1.77)                                | 0.73 (0.36-1.51)                                | 1.2 (0.53-2.7)                                      | 0.79 (0.28-2.19)                                 |
|                         | 6                 | 26.14                         | 0.95 (0.46-1.96)                                | 1.02 (0.45-2.29)                                | 0.84 (0.38-1.82)                                    | 0.85 (0.32-2.28)                                 |
|                         | 7                 | 26.17                         | 0.96 (0.48-1.92)                                | 1.25 (0.61-2.59)                                | 0.85 (0.36-2.03)                                    | 0.85 (0.28-2.6)                                  |
|                         | 8                 | 26.30                         | 1.49 (0.68-3.23)                                | 1.58 (0.69-3.63)                                | 1.17 (0.54-2.52)                                    | 1.42 (0.47-4.35)                                 |
| <b>CO</b>               | 3                 | 788.01                        | 1.32 (0.58-3.01)                                | 0.82 (0.36-1.85)                                | 1.32 (0.48-3.66)                                    | 0.79 (0.23-2.77)                                 |
|                         | 4                 | 778.43                        | 0.78 (0.35-1.76)                                | 0.56 (0.23-1.35)                                | 2.83 (0.92-8.72)                                    | 0.59 (0.17-2.03)                                 |
|                         | 5                 | 796.44                        | 1.13 (0.47-2.7)                                 | 1.02 (0.48-2.18)                                | 1.57 (0.5-4.89)                                     | 1.19 (0.39-3.63)                                 |
|                         | 6                 | 783.77                        | 1.04 (0.43-2.48)                                | 1.35 (0.59-3.12)                                | 0.58 (0.21-1.62)                                    | 1.18 (0.34-4.05)                                 |
|                         | 7                 | 802.66                        | 0.73 (0.33-1.61)                                | 1.11 (0.5-2.49)                                 | 0.57 (0.2-1.62)                                     | 0.76 (0.26-2.23)                                 |
|                         | 8                 | 796.83                        | 1.28 (0.52-3.18)                                | 1.19 (0.51-2.78)                                | 0.72 (0.31-1.66)                                    | 0.95 (0.33-2.73)                                 |

Estimates significant at the 0.05 significance level are **bolded**

236 Estimates of relative odds and their 95% CI derived from comparing the lowest quartile of

237 PM<sub>2.5</sub> concentration with 2nd-4th quartiles are presented in Figures 2-6. Our primary goal was to

238 visually show the general trend of dose-response for different types of CA instead of specific

239 numbers due to the instability of effect estimates caused by a small sample size. For brevity, we  
240 show estimates of the short-term effect of PM<sub>2.5</sub> on cardiovascular, musculoskeletal, cardiac septal,  
241 and ventricular septal defects (VSD) as examples. We observed dose-response patterns for weeks 6  
242 and 7 for cardiovascular and cardiac septal defects, but for VSD, the increasing dose-response trend  
243 occurred in week 4. A less pronounced dose-response trend was observed in weeks 4 and 8 for  
244 musculoskeletal anomalies and cleft lip and palate. We found similarly suggestive dose-response  
245 patterns in different pollutants, gestational weeks, and congenital anomalies (results not shown).

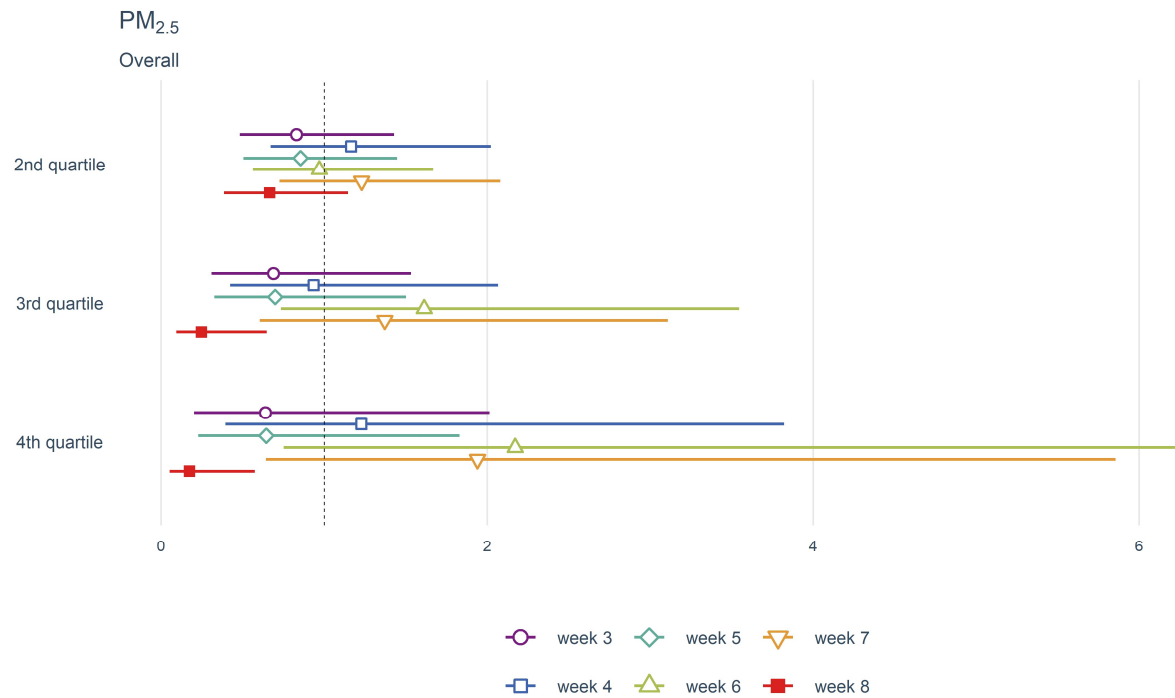

246

247 Figure 2. Effect estimates of air pollution on cardiovascular anomaly risk

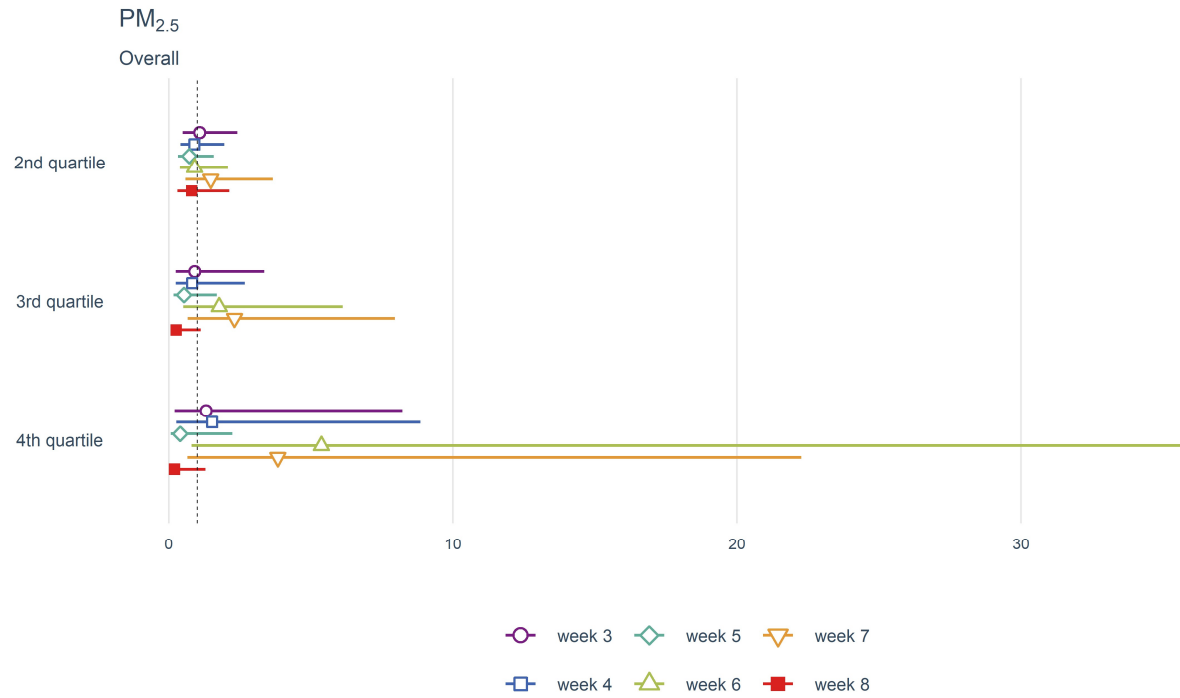

248

249 Figure 3. Effect estimates of air pollution on cardiac septal anomaly risk

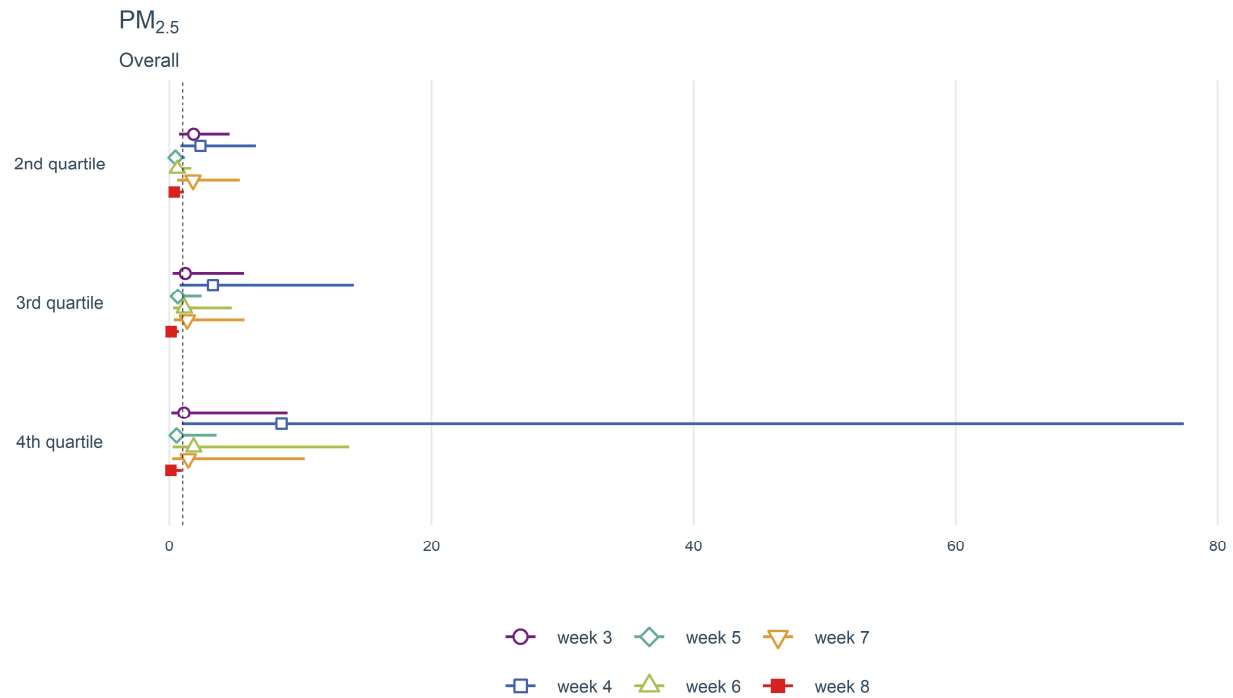

250

251 Figure 4. Effect estimates of air pollution on ventricular septal defect risk

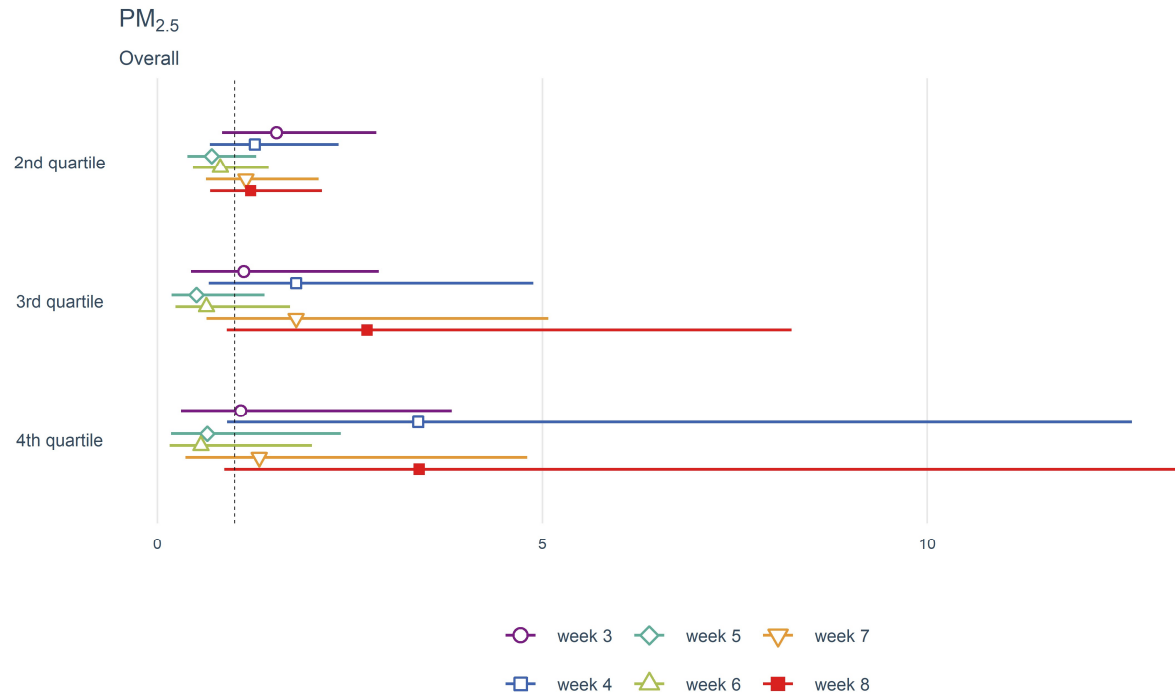

252

253 Figure 5. Effect estimates of air pollution on musculoskeletal anomaly risk

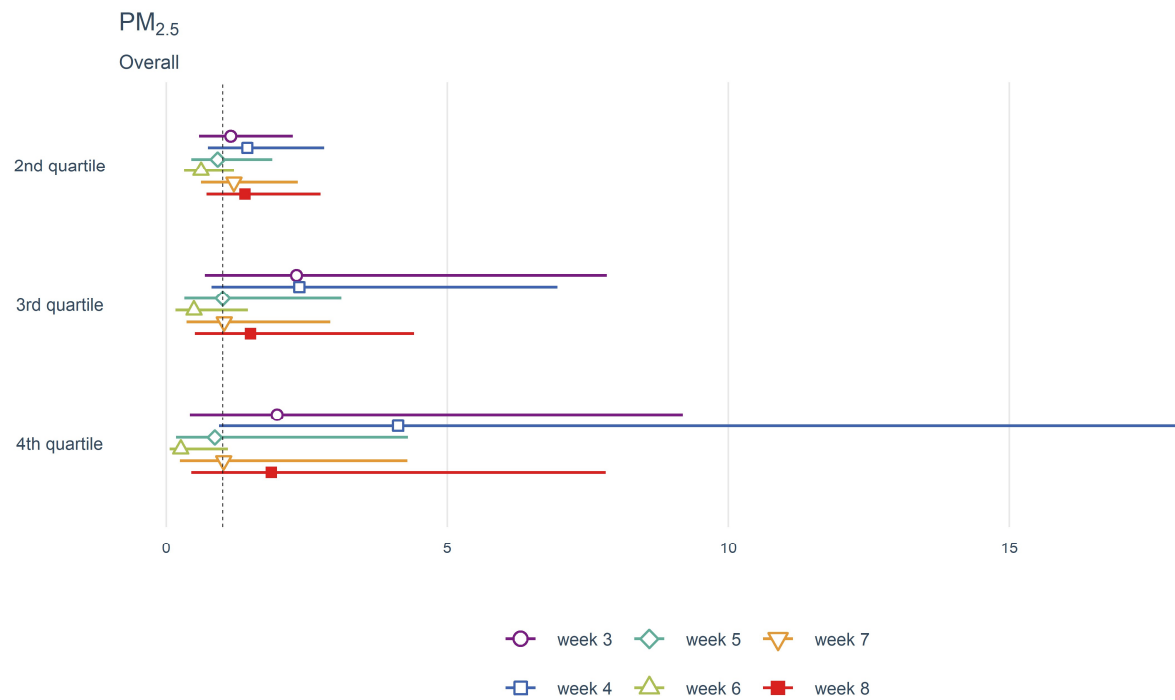

254

255 Figure 6. Effect estimates of air pollution on cleft lip and cleft palate risk



## 256 Discussion

257 We found a considerably increased short-term risk of cardiovascular defects, particularly  
258 cardiac septal defects, associated with per IQR increase in mean concentrations of PM<sub>2.5</sub> and CO in  
259 gestational week 7. This association was further observed to have dose-response gradients when  
260 using categorical exposure measures. Although there have been multiple studies looking at the  
261 association between ambient air pollution and congenital anomalies in recent years (Girguis et al.,  
262 2016; Huang et al., 2019; Lavigne et al., 2019; Vinceti et al., 2016; Zhang et al., 2016; Zhao et al.,  
263 2018), our results contribute substantially to the evidence base on short-term effects of air pollution  
264 on congenital anomalies by looking at susceptible periods of foetal development at fine temporal  
265 detail. To our knowledge, this is the first study to utilize case-crossover design to control for time-  
266 invariant confounders in examining the association between ambient air pollution and congenital  
267 anomalies.

268 The findings of our study suggest that there may be differential effects of air pollutants  
269 within the critical period of foetus development (weeks 3-8). This is corroborated by embryological  
270 studies on lab animals showing specific stages of organ development. For instance, neural crest cells  
271 start migrating to develop endocardial tubes at the start of the fourth week, resulting in ventricular  
272 septation and outflow tract formation by weeks 7 and 8 in cardiac development (Gittenberger-de  
273 Groot et al., 2005). There is also evidence of teratogen-induced oxidative stress in earlier weeks  
274 affecting later developments of cardiac structures via apoptosis among migrating cells (Morgan et al.,  
275 2008) or different pathway of neural crest cells (Jain et al., 2011). Therefore, it is possible that  
276 harmful air pollutant exposure at a particular gestational week may not present itself in the form of  
277 CA until later weeks. Additional experimental studies to elucidate this relationship are needed.

278 In contrast to previous studies, we could not look at isolated congenital anomalies except for  
279 VSD due to the small sample size in each of the ICD-10 subchapters. This is important since it is  
280 unlikely that a specific air pollutant would affect all types of anomalies and that even single, isolated  
281 anomalies could have multifactorial aetiology (B. Ritz, 2010). With that said, our finding of an  
282 association between cardiovascular defects and particulate matter is consistent with several earlier  
283 case-control studies (Agay-Shay et al., 2013; Huang et al., 2019; Padula et al., 2013; Stingone et al.,  
284 2014; Zhang et al., 2016). Most of the previous literature on the topic considered somewhat coarse  
285 temporal resolution when it comes to vulnerable periods of development by using either monthly  
286 averages of the first three months of pregnancy or average of gestational weeks 3-8. Below we  
287 compare our results to a few studies examining specific gestational week exposures. Stingone et  
288 al. examined maternal exposure to criteria air pollutants and congenital heart defects using the US  
289 National Congenital Anomalies Prevention Study data. They used both 1-week and 7-week averages  
290 of pollutants using the closest monitoring station to the maternal residence and found several  
291 individual exposure-weeks associations that were not identified from 7-week averages (Stingone et  
292 al., 2014). Specifically, the association between VSD and particulate matter was stronger in week  
293 three than in week 4 in our categorical exposure findings (Figure 6). Two studies from Wuhan,  
294 China, looked at the association between air pollution and the risk of congenital heart defects  
295 (Zhang et al., 2016) and oral clefts (Zhao et al., 2018). Zhang et al. found monotonically increasing  
296 relative odds of VSD per  $10\mu\text{g}/\text{m}^3$  increase in mean  $\text{PM}_{2.5}$  concentration during gestational weeks 7-  
297 10. This is somewhat comparable to our finding of significant association between VSD and per  
298 IQR increase in the mean concentration of  $\text{PM}_{2.5}$  in week 7. On the other hand, Zhao et al. reported  
299 an increased risk of oral cleft associated with per  $10\mu\text{g}/\text{m}^3$  change in  $\text{PM}_{2.5}$  in gestational weeks 4-9.  
300 In contrast, we found increased relative odds of cleft lip and cleft palate subchapter and  $\text{PM}_{2.5}$ ,  $\text{SO}_2$ ,  
301 and CO in week 4 (Table 4).

302 In order to interpret our findings in the context of current literature, we must keep in mind  
303 the emission source of air pollution in UB. As we noted before, the dominant source is domestic  
304 coal combustion due to the need for heating and cooking in Ger districts during harsh winters  
305 exacerbated by atmospheric inversion and lower mixing height during cold seasons. This is an  
306 important and distinct emissions source as compared to manufacturing in developing countries and  
307 vehicular emission in developed countries. The composition of particulate matter may be  
308 substantially different from compositions in other countries, and this may differentially affect the  
309 susceptible windows of organ development with regards to specific CA. Considering this and the  
310 relatively homogenous population of Mongolia, the generalizability of our study results may be  
311 limited. However, despite these differences, it is suggestive to see partially consistent results with  
312 previous studies.

313 Estimating personal exposure via prediction modelling based on scarce ground-level  
314 monitors will inevitably lead to measurement error in exposure regardless of the model performance.  
315 In addition, we were only able to predict air pollution exposure based on the residential  
316 administrative unit (Khoroo) at the time of delivery. However, a recent study on the effect of  
317 residential mobility during pregnancy on air pollution exposure misclassification found a minor  
318 impact (Warren et al., 2018). Measurement errors resulting from the above reasons will be non-  
319 differential and will likely lead to underestimating the risk. The other limitation of our study was the  
320 inadequate sample size for investigating the effect of air pollutants on isolated congenital anomalies  
321 rather than ICD-10 subchapters that covered an extensive range of congenital anomalies with  
322 possibly differing aetiologies. This was unavoidable due to the relatively recent establishment of the  
323 National Surveillance Department in Mongolia and will only strengthen as time goes by.

324           This study observed increased relative odds of select CA with short-term, higher exposure to  
325 air pollutants at specific periods of gestation critical for organogenesis. Some of the associations  
326 were only on specific weeks. They had a dose-response trend, which suggests that accounting for  
327 temporal and spatial variability may lead to a better understanding of how and when air pollutants  
328 affect CA risk. Future studies in this research area should focus on improving exposure assessment,  
329 incorporating a multipollutant approach, and ascertaining more isolated congenital anomalies to  
330 facilitate the investigation into different susceptible windows of various congenital anomalies.

331

332           **References**

- 333   Agay-Shay, K., Friger, M., Linn, S., Peled, A., Amitai, Y., & Peretz, C. (2013). Air pollution and congenital heart  
334           defects. *Environmental Research*, *124*(2), 28–34. <https://doi.org/10/ggs7xk>
- 335   Allen, R. W., Gombojav, E., Barkhasragchaa, B., Byambaa, T., Lkhasuren, O., Amram, O., Takaro, T. K., & Janes, C. R.  
336           (2013). An assessment of air pollution and its attributable mortality in Ulaanbaatar, Mongolia. *Air Quality,*  
337           *Atmosphere and Health*, *6*(1), 137–150. <https://doi.org/10/cb52dj>
- 338   Baccarelli, A., & Bollati, V. (2009). Epigenetics and environmental chemicals. *Current Opinion in Pediatrics*, *21*(2),  
339           243–251. <https://doi.org/10/b3s37g>
- 340   Chen, E., Zmirou-Navier, D., Padilla, C., & Deguen, S. (2014). Effects of Air Pollution on the Risk of Congenital  
341           Anomalies: A Systematic Review and Meta-Analysis. *International Journal of Environmental Research and*  
342           *Public Health*, *11*(8), 7642–7668. <https://doi.org/10/f6f4ps>
- 343   Christianson, A., Howson, C. P., & Modell, B. (2005). March of Dimes: Global report on birth defects, the hidden toll  
344           of dying and disabled children. *March of Dimes: Global Report on Birth Defects, the Hidden Toll of Dying*  
345           *and Disabled Children*.
- 346   Dadvand, P., Rankin, J., Rushton, S., & Pless-Mulloli, T. (2011). Association Between Maternal Exposure to Ambient  
347           Air Pollution and Congenital Heart Disease: A Register-based Spatiotemporal Analysis. *American Journal of*  
348           *Epidemiology*, *173*(2), 171–182. <https://doi.org/10/b2sjbx>
- 349   Dolk, H., Armstrong, B., Lachowycz, K., Vrijheid, M., Rankin, J., Abramsky, L., Boyd, P. A., & Wellesley, D. (2010).  
350           Ambient air pollution and risk of congenital anomalies in England, 1991-1999. *Occupational and*  
351           *Environmental Medicine*, *67*(4), 223–227. <https://doi.org/10/bttz79>
- 352   Enebish, T., Chau, K., Jadamba, B., & Franklin, M. (2020). Predicting ambient PM2.5 concentrations in Ulaanbaatar,  
353           Mongolia with machine learning approaches. *Journal of Exposure Science & Environmental Epidemiology*.  
354           <https://doi.org/10/gg65t7>
- 355   Enebish, T., Warburton, D., Habre, R., Breton, C., Tuvshindorj, N., Tumur, G., Munkhuu, B., & Franklin, M. (2022).  
356           *The acute lag effects of elevated ambient air pollution on stillbirth risk in Ulaanbaatar, Mongolia* (p.  
357           2022.02.17.22271117). medRxiv. <https://doi.org/10.1101/2022.02.17.22271117>

- 358 Enkhmaa, D., Warburton, N., Javzandulam, B., Uyanga, J., Khishigsuren, Y., Lodoysamba, S., Enkhtur, S., &  
359 Warburton, D. (2014). Seasonal ambient air pollution correlates strongly with spontaneous abortion in  
360 Mongolia. *BMC Pregnancy and Childbirth*, *14*(1), 146. <https://doi.org/10/gb8xz5>
- 361 Enkhtur, S., & Bayalag, M. (Eds.). (2019). *Comprehensive Survey of the Status of Maternal and Child Morbidity and*  
362 *Mortality, and Prevalence of Congenital Anomalies in Mongolia—V*. National Center for Maternal and  
363 Child Health. [https://www.mediafire.com/file/7d5s3pdadjuesaj/burdel\\_LAST\\_FINISH\\_20200102.pdf/file](https://www.mediafire.com/file/7d5s3pdadjuesaj/burdel_LAST_FINISH_20200102.pdf/file)
- 364 Gianicolo, E. A. L., Mangia, C., Cervino, M., Bruni, A., Andreassi, M. G., & Latini, G. (2014). Congenital anomalies  
365 among live births in a high environmental risk area-A case-control study in Brindisi (southern Italy).  
366 *Environmental Research*, *128*(349), 9–14. <https://doi.org/10/f5n8xx>
- 367 Gilboa, S. M., Mendola, P., Olshan, A. F., Langlois, P. H., Savitz, D. A., Loomis, D., Herring, A. H., & Fixler, D. E.  
368 (2005). Relation between ambient air quality and selected birth defects, seven county study, Texas, 1997-  
369 2000. *American Journal of Epidemiology*, *162*(3), 238–252. <https://doi.org/10/dqbf76>
- 370 Girguis, M. S., Strickland, M. J., Hu, X., Liu, Y., Bartell, S. M., & Vieira, V. M. (2016). Maternal exposure to traffic-  
371 related air pollution and birth defects in Massachusetts. *Environmental Research*, *146*, 1–9.  
372 <https://doi.org/10/f8ccjx>
- 373 Gittenberger-de Groot, A. C., Bartelings, M. M., Deruiter, M. C., & Poelmann, R. E. (2005). Basics of cardiac  
374 development for the understanding of congenital heart malformations. *Pediatric Research*, *57*(2), 169–  
375 176. <https://doi.org/10/ftxzrb>
- 376 Hansen, C. A., Barnett, A. G., Jalaludin, B. B., & Morgan, G. G. (2009). Ambient air pollution and birth defects in  
377 Brisbane, Australia. *PLoS ONE*, *4*(4), 6–13. <https://doi.org/10/fj9pjr>
- 378 Herbstman, J. B., Tang, D., Zhu, D., Qu, L., Sjodin, A., Li, Z., Camann, D., & Perera, F. P. (2012). Prenatal exposure to  
379 polycyclic aromatic hydrocarbons, benzo[a]pyrene-DNA adducts, and genomic DNA methylation in cord  
380 blood. *Environmental Health Perspectives*, *120*(5), 733–738. <https://doi.org/10/fx8pju>
- 381 Hou, L., Zhang, X., Wang, D., & Baccarelli, A. (2012). Environmental chemical exposures and human epigenetics.  
382 *International Journal of Epidemiology*, *41*(1), 79–105. <https://doi.org/10/bsvw8b>
- 383 Huang, C., Chen, B., Pan, S., Ho, Y., & Guo, Y. L. (2019). Prenatal exposure to PM2.5 and Congenital Heart Diseases  
384 in Taiwan. *Science of The Total Environment*, *655*, 880–886. <https://doi.org/10/ggs8qv>

- 385 Jain, R., Engleka, K. A., Rentschler, S. L., Manderfield, L. J., Li, L., Yuan, L., & Epstein, J. A. (2011). Cardiac neural  
386 crest orchestrates remodeling and functional maturation of mouse semilunar valves. *The Journal of*  
387 *Clinical Investigation*, 121(1), 422–430. <https://doi.org/10/fddm5n>
- 388 Janes, H., Sheppard, L., & Lumley, T. (2005). Overlap bias in the case-crossover design, with application to air  
389 pollution exposures. *Statistics in Medicine*, 24(2), 285–300. <https://doi.org/10/cj5hqx>
- 390 Janssen, B. G., Godderis, L., Pieters, N., Poels, K., Kiciński, M., Cuypers, A., Fierens, F., Penders, J., Plusquin, M.,  
391 Gyselaers, W., & Nawrot, T. S. (2013). Placental DNA hypomethylation in association with particulate air  
392 pollution in early life. *Particle and Fibre Toxicology*, 10(1), 22. <https://doi.org/10/gbdj7v>
- 393 Joint WHO-March of Dimes Meeting on Management of Birth Defects and Haemoglobin Disorders (2nd : 2006 :  
394 Geneva, S., Organization, W. H., & Dimes, M. of. (2006). *Management of birth defects and haemoglobin*  
395 *disorders: Report of a joint WHO-March of Dimes meeting, Geneva, Switzerland, 17-19 May 2006*. World  
396 Health Organization. <https://apps.who.int/iris/handle/10665/43587>
- 397 Jonakait, G. M. (2007). The effects of maternal inflammation on neuronal development: Possible mechanisms.  
398 *International Journal of Developmental Neuroscience*, 25(7), 415–425. <https://doi.org/10/fq8m9h>
- 399 Kannan, S., Misra, D. P., Dvonch, J. T., & Krishnakumar, A. (2006). Exposures to airborne particulate matter and  
400 adverse perinatal outcomes: A biologically plausible mechanistic framework for exploring potential effect  
401 modification by nutrition. *Environmental Health Perspectives*, 114(11), 1636–1642.  
402 <https://doi.org/10/fsz694>
- 403 Lavigne, E., Lima, I., Hatzopoulou, M., Van Ryswyk, K., Decou, M. L., Luo, W., van Donkelaar, A., Martin, R. V., Chen,  
404 H., Stieb, D. M., Crighton, E., Gasparrini, A., Elten, M., Yasseen, A. S., Burnett, R. T., Walker, M., &  
405 Weichenthal, S. (2019). Spatial variations in ambient ultrafine particle concentrations and risk of  
406 congenital heart defects. *Environment International*, 130, 104953. <https://doi.org/10/ggs8qz>
- 407 Lin, Y. T., Lee, Y. L., Jung, C. R., Jaakkola, J. J. K., & Hwang, B. F. (2014). Air pollution and limb defects: A matched-  
408 pairs case-control study in Taiwan. *Environmental Research*, 132, 273–280. <https://doi.org/10/ggs7xq>
- 409 Marshall, E. G., Harris, G., & Wartenberg, D. (2010). Oral cleft defects and maternal exposure to ambient air  
410 pollutants in New Jersey. *Birth Defects Research Part A - Clinical and Molecular Teratology*, 88(4), 205–  
411 215. <https://doi.org/10/fw3nx2>

- 412 Morgan, S. C., Relaix, F., Sandell, L. L., & Loeken, M. R. (2008). Oxidative stress during diabetic pregnancy disrupts  
413 cardiac neural crest migration and causes outflow tract defects. *Birth Defects Research Part A: Clinical and*  
414 *Molecular Teratology*, 82(6), 453–463. <https://doi.org/10/fw77gc>
- 415 Padula, A. M., Tager, I. B., Carmichael, S. L., Hammond, S. K., Lurmann, F., & Shaw, G. M. (2013). The association of  
416 ambient air pollution and traffic exposures with selected congenital anomalies in the San Joaquin Valley of  
417 California. *American Journal of Epidemiology*, 177(10), 1074–1085. <https://doi.org/10/f4xsbq>
- 418 Pebesma, E. (2018). Simple Features for R: Standardized Support for Spatial Vector Data. *The R Journal*, 10(1), 439–  
419 446. <https://doi.org/10/gf2ztt>
- 420 Perera, F. P., Jedrychowski, W., Rauh, V., & Whyatt, R. M. (1999). Molecular epidemiologic research on the effects  
421 of environmental pollutants on the fetus. *Environmental Health Perspectives*, 107 Suppl(February), 451–  
422 460. [https://doi.org/sc271\\_5\\_1835](https://doi.org/sc271_5_1835) [pii]
- 423 R Core Team. (2019). *R: A language and environment for statistical computing*. <https://www.R-project.org/>
- 424 Rankin, J., Chadwick, T., Natarajan, M., Howel, D., Pearce, M. S., & Pless-Mullooli, T. (2009). Maternal exposure to  
425 ambient air pollutants and risk of congenital anomalies. *Environmental Research*, 109(2), 181–187.  
426 <https://doi.org/10/fddwzt>
- 427 Ritz, B. (2010). Air pollution and congenital anomalies. *Occupational and Environmental Medicine*, 67(4), 221–222.  
428 <https://doi.org/10/c8xmsb>
- 429 Ritz, B. R., Yu, F., Fruin, S., Chapa, G., Shaw, G. M., & Harris, J. A. (2002). Ambient air pollution and risk of birth  
430 defects in southern california. *American Journal of Epidemiology*, 155(1), 17–25.
- 431 Schembari, A., Nieuwenhuijsen, M. J., Salvador, J., de Nazelle, A., Cirach, M., Dadvand, P., Beelen, R., Hoek, G.,  
432 Basagaña, X., & Vrijheid, M. (2014). Traffic-related air pollution and congenital anomalies in Barcelona.  
433 *Environmental Health Perspectives*, 122(3), 317–323. <https://doi.org/10/ggs7w9>
- 434 Slama, R., Darrow, L., Parker, J., Woodruff, T. J., Strickland, M., Nieuwenhuijsen, M., Glinianaia, S., Hoggatt, K. J.,  
435 Kannan, S., Hurley, F., Kalinka, J., Šrám, R., Brauer, M., Wilhelm, M., Henrich, J., & Ritz, B. (2008). Meeting  
436 report: Atmospheric pollution and human reproduction. *Environmental Health Perspectives*, 116(6), 791–  
437 798. <https://doi.org/10/dgs6xr>



- 438 Stingone, J. A., Luben, T. J., Daniels, J. L., Fuentes, M., Richardson, D. B., Aylsworth, A. S., Herring, A. H., Anderka,  
439 M., Botto, L., Correa, A., Gilboa, S. M., Langlois, P. H., Mosley, B., Shaw, G. M., Siffel, C., & Olshan, A. F.  
440 (2014). Maternal exposure to criteria air pollutants and congenital heart defects in offspring: Results from  
441 the National Birth Defects Prevention Study. *Environmental Health Perspectives*, 122(8), 863–872.  
442 <https://doi.org/10/f6hc6d>
- 443 Therneau, T. M., & Grambsch, P. M. (2000). The Cox Model. In T. M. Therneau & P. M. Grambsch (Eds.), *Modeling*  
444 *Survival Data: Extending the Cox Model* (pp. 39–77). Springer. [https://doi.org/10.1007/978-1-4757-3294-](https://doi.org/10.1007/978-1-4757-3294-8_3)  
445 [8\\_3](https://doi.org/10.1007/978-1-4757-3294-8_3)
- 446 Vinceti, M., Malagoli, C., Malavolti, M., Cherubini, A., Maffei, G., Rodolfi, R., Heck, J. E., Astolfi, G., Calzolari, E., &  
447 Nicolini, F. (2016). Does maternal exposure to benzene and PM10 during pregnancy increase the risk of  
448 congenital anomalies? A population-based case-control study. *Science of the Total Environment*, 541,  
449 444–450. <https://doi.org/10/ggs7xc>
- 450 Vrijheid, M., Martinez, D., Manzanares, S., Dadvand, P., Schembari, A., Rankin, J., & Nieuwenhuijsen, M. (2011).  
451 Ambient air pollution and risk of congenital anomalies: A systematic review and meta-analysis.  
452 *Environmental Health Perspectives*, 119(5), 598–606. <https://doi.org/10/fb2vcd>
- 453 Warren, J. L., Son, J.-Y., Pereira, G., Leaderer, B. P., & Bell, M. L. (2018). Investigating the Impact of Maternal  
454 Residential Mobility on Identifying Critical Windows of Susceptibility to Ambient Air Pollution During  
455 Pregnancy. *American Journal of Epidemiology*, 187(5), 992–1000. <https://doi.org/10/gdkrxx>
- 456 Wickham, H., Averick, M., Bryan, J., Chang, W., McGowan, L. D., François, R., Grolemund, G., Hayes, A., Henry, L.,  
457 Hester, J., Kuhn, M., Pedersen, T. L., Miller, E., Bache, S. M., Müller, K., Ooms, J., Robinson, D., Seidel, D.  
458 P., Spinu, V., ... Yutani, H. (2019). Welcome to the tidyverse. *Journal of Open Source Software*, 4(43), 1686.  
459 <https://doi.org/10/ggddkj>
- 460 World Health Organization. (2004). *ICD-10: International statistical classification of diseases and related health*  
461 *problems: Tenth revision*. Spanish version, 1st edition published by PAHO as Publicación Científica 544.
- 462 World Health Organization. (2017). *Causes of child mortality*. Global Health Observatory Data.  
463 [http://www.who.int/gho/child\\_health/mortality/causes/en/](http://www.who.int/gho/child_health/mortality/causes/en/)

- 464 Zhang, B., Liang, S., Zhao, J., Qian, Z., Bassig, B. A., Yang, R., Zhang, Y., Hu, K., Xu, S., Zheng, T., & Yang, S. (2016).  
465 Maternal exposure to air pollutant PM2.5 and PM10 during pregnancy and risk of congenital heart  
466 defects. *Journal of Exposure Science & Environmental Epidemiology*, 26(4), 422–427.  
467 <https://doi.org/10/f8r4ss>
- 468 Zhao, J., Zhang, B., Yang, S., Mei, H., Qian, Z., Liang, S., Zhang, Y., Hu, K., Tan, Y., Xian, H., Belue, R., Jordan, S. S., Xu,  
469 S., Zheng, T., & Du, Y. (2018). Maternal exposure to ambient air pollutant and risk of oral clefts in Wuhan,  
470 China. *Environmental Pollution*, 238, 624–630. <https://doi.org/10/gdrp6>  
471
